# Supplementary material for: The association of self-reported symptoms of central sensitization and sleep disturbances in neuropathic pain
Source: PubMed Central journal article supplement — Pain Rep. 2023 Sep 26;8(5):e1098. doi: 10.1097/PR9.0000000000001098 (PMC10531265; doi:10.1097/pr9.0000000000001098), 2023-09-26
Supplement: painreports-8-e1098-s001.pdf [file painreports-8-e1098-s001.pdf]

## Supplementary material

**Supplement Table 1.** Spearman correlations of the somatosensory phenotype (PD-Q), depression (PHQ-9) and pain intensity (VAS) on patterns of sleep (MOS Sleep Scale) in patients with diabetic polyneuropathy (n=534).

|                                                                              | Sleep disturbance | Sleep adequacy     | Sleep somnolence  | Sleep quantity     | PHQ-9 score       |
|------------------------------------------------------------------------------|-------------------|--------------------|-------------------|--------------------|-------------------|
| Burning                                                                      | 0.23<br>(p<0.001) | -0.17<br>(p<0.001) | 0.16<br>(p<0.001) | -0.11<br>(p=0.009) | 0.24<br>(p<0.001) |
| Prickling                                                                    | 0.23<br>(p<0.001) | -0.18<br>(p<0.001) | 0.21<br>(p<0.001) | -0.12<br>(p=0.006) | 0.22<br>(p<0.001) |
| Allodynia                                                                    | 0.32<br>(p<0.001) | -0.26<br>(p<0.001) | 0.23<br>(p<0.001) | -0.25<br>(p<0.001) | 0.27<br>(p<0.001) |
| Pain attacks                                                                 | 0.25<br>(p<0.001) | -0.19<br>(p<0.001) | 0.18<br>(p<0.001) | -0.16<br>(p<0.001) | 0.27<br>(p<0.001) |
| Thermal hyperalgesia                                                         | 0.23<br>(p<0.001) | -0.21<br>(p<0.001) | 0.15<br>(p<0.001) | -0.19<br>(p<0.001) | 0.25<br>(p<0.001) |
| Numbness                                                                     | 0.15<br>(p<0.001) | -0.07<br>(n.s.)    | 0.18<br>(p<0.001) | -0.11<br>(p=0.011) | 0.16<br>(p<0.001) |
| Pressure-evoked pain                                                         | 0.32<br>(p<0.001) | -0.24<br>(p<0.001) | 0.23<br>(p<0.001) | -0.23<br>(p<0.001) | 0.30<br>(p<0.001) |
| PHQ-9 score                                                                  | 0.52<br>(p<0.001) | -0.55<br>(p<0.001) | 0.48<br>(p<0.001) | -0.35<br>(p<0.001) |                   |
| Average pain (VAS)                                                           | 0.32<br>(p<0.001) | -0.29<br>(p<0.001) | 0.29<br>(p<0.001) | -0.19<br>(p<0.001) | 0.43<br>(p<0.001) |
| Maximum pain (NRS)                                                           | 0.30<br>(p<0.001) | -0.28<br>(p<0.001) | 0.31<br>(p<0.001) | -0.21<br>(p<0.001) | 0.37<br>(p<0.001) |
| Displayed are the Spearman correlation coefficients<br>n.s., not significant |                   |                    |                   |                    |                   |

**Supplement Table 2.** Spearman correlations of the somatosensory phenotype (PD-Q), depression (PHQ-9) and pain intensity (VAS) on patterns of sleep (MOS Sleep Scale) in patients with postherpetic neuralgia (n=1480).

|                                                     | Sleep disturbance | Sleep adequacy     | Sleep somnolence  | Sleep quantity     | PHQ-9 score       |
|-----------------------------------------------------|-------------------|--------------------|-------------------|--------------------|-------------------|
| Burning                                             | 0.22<br>(p<0.001) | -0.20<br>(p<0.001) | 0.14<br>(p<0.001) | -0.16<br>(p<0.001) | 0.22<br>(p<0.001) |
| Prickling                                           | 0.15<br>(p<0.001) | -0.13<br>(p<0.001) | 0.10<br>(p<0.001) | -0.08<br>(p=0.002) | 0.19<br>(p<0.001) |
| Allodynia                                           | 0.17<br>(p<0.001) | -0.14<br>(p<0.001) | 0.19<br>(p<0.001) | -0.12<br>(p<0.001) | 0.21<br>(p<0.001) |
| Pain attacks                                        | 0.15<br>(p<0.001) | -0.14<br>(p<0.001) | 0.20<br>(p<0.001) | -0.09<br>(p<0.001) | 0.24<br>(p<0.001) |
| Thermal hyperalgesia                                | 0.16<br>(p<0.001) | -0.14<br>(p<0.001) | 0.17<br>(p<0.001) | -0.10<br>(p<0.001) | 0.19<br>(p<0.001) |
| Numbness                                            | 0.13<br>(p<0.001) | -0.10<br>(p<0.001) | 0.09<br>(p<0.001) | -0.06<br>(p=0.022) | 0.19<br>(p<0.001) |
| Pressure-evoked pain                                | 0.17<br>(p<0.001) | -0.10<br>(p<0.001) | 0.18<br>(p<0.001) | -0.08<br>(p=0.003) | 0.21<br>(p<0.001) |
| PHQ-9 score                                         | 0.46<br>(p<0.001) | -0.46<br>(p<0.001) | 0.50<br>(p<0.001) | -0.30<br>(p<0.001) |                   |
| Average pain (VAS)                                  | 0.27<br>(p<0.001) | -0.26<br>(p<0.001) | 0.28<br>(p<0.001) | -0.22<br>(p<0.001) | 0.38<br>(p<0.001) |
| Maximum pain (NRS)                                  | 0.25<br>(p<0.001) | -0.24<br>(p<0.001) | 0.27<br>(p<0.001) | -0.21<br>(p<0.001) | 0.37<br>(p<0.001) |
| Displayed are the Spearman correlation coefficients |                   |                    |                   |                    |                   |

**Supplement Table 3.** Correlations of the somatosensory phenotype (PD-Q), depression (PHQ-9) and pain intensity (VAS) on patterns of sleep (MOS Sleep Scale) in patients with complex regional pain syndrome (n=1316).

|                                                     | Sleep disturbance | Sleep adequacy     | Sleep somnolence  | Sleep quantity     | PHQ-9 score       |
|-----------------------------------------------------|-------------------|--------------------|-------------------|--------------------|-------------------|
| Burning                                             | 0.23<br>(p<0.001) | -0.20<br>(p<0.001) | 0.16<br>(p<0.001) | -0.24<br>(p<0.001) | 0.22<br>(p<0.001) |
| Prickling                                           | 0.22<br>(p<0.001) | -0.17<br>(p<0.001) | 0.17<br>(p<0.001) | -0.19<br>(p<0.001) | 0.27<br>(p<0.001) |
| Allodynia                                           | 0.31<br>(p<0.001) | -0.26<br>(p<0.001) | 0.23<br>(p<0.001) | -0.28<br>(p<0.001) | 0.29<br>(p<0.001) |
| Pain attacks                                        | 0.24<br>(p<0.001) | -0.22<br>(p<0.001) | 0.24<br>(p<0.001) | -0.21<br>(p<0.001) | 0.26<br>(p<0.001) |
| Thermal hyperalgesia                                | 0.29<br>(p<0.001) | -0.26<br>(p<0.001) | 0.20<br>(p<0.001) | -0.25<br>(p<0.001) | 0.29<br>(p<0.001) |
| Numbness                                            | 0.25<br>(p<0.001) | -0.20<br>(p<0.001) | 0.17<br>(p<0.001) | -0.19<br>(p<0.001) | 0.24<br>(p<0.001) |
| Pressure-evoked pain                                | 0.27<br>(p<0.001) | -0.24<br>(p<0.001) | 0.19<br>(p<0.001) | -0.23<br>(p<0.001) | 0.27<br>(p<0.001) |
| PHQ-9 score                                         | 0.53<br>(p<0.001) | -0.53<br>(p<0.001) | 0.55<br>(p<0.001) | -0.40<br>(p<0.001) |                   |
| Average pain (VAS)                                  | 0.29<br>(p<0.001) | -0.29<br>(p<0.001) | 0.22<br>(p<0.001) | -0.28<br>(p<0.001) | 0.33<br>(p<0.001) |
| Maximum pain (NRS)                                  | 0.26<br>(p<0.001) | -0.30<br>(p<0.001) | 0.26<br>(p<0.001) | -0.26<br>(p<0.001) | 0.33<br>(p<0.001) |
| Displayed are the Spearman correlation coefficients |                   |                    |                   |                    |                   |
